# Supplementary material for: Development of A Nomogram to Predict Survival Outcome Among Epithelial Ovarian Cancer Patients With Site-Distant Metastases: A Population-Based Study
Source: Research Square preprint supplement (doi:10.21203/rs.3.rs-74768/v1), 2020-10-06
Supplement: Supplementary file 1 [file 9dd0b1e0d33cad6a295c66df.docx]

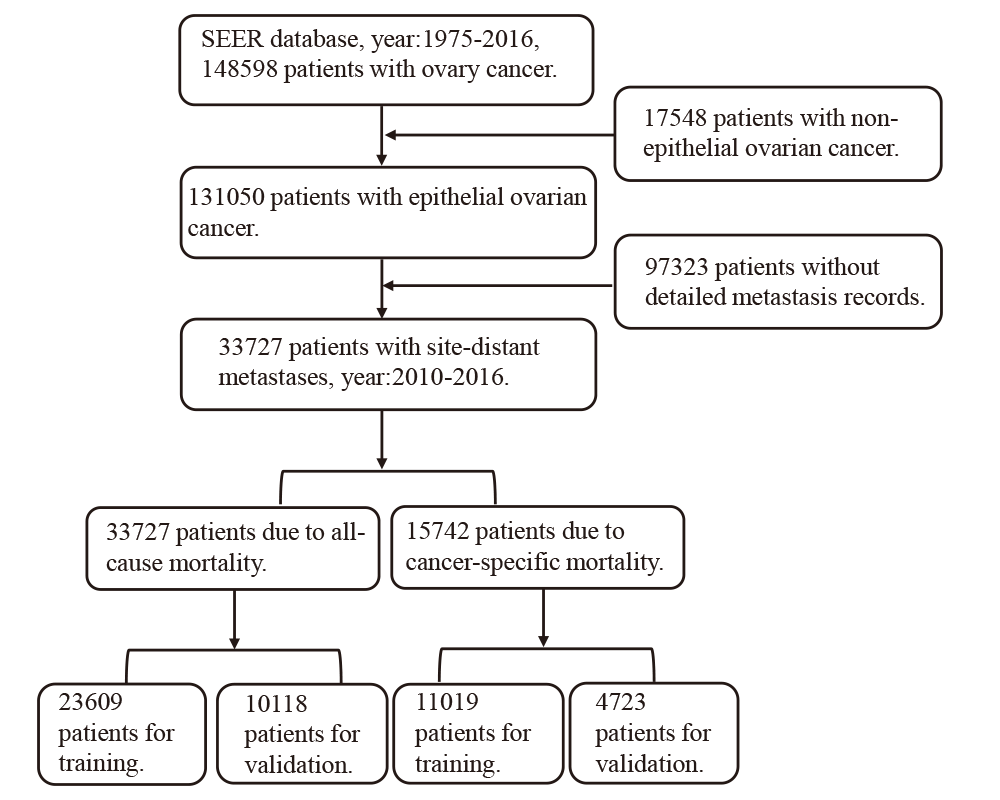


Figures1. Flow diagram with selection procedure of patients with epithelial ovarian cancer for analysis
